# Supplementary material
Source: MDPI journal article supplement (https://www.mdpi.com/2072-4292/7/12/15849)
Supplement: s1 [file s1]

Supplementary Information: Designing Climate-Resilient Marine Protected Areas Networks by Combining Remotely Sensed Coral Reef Habitat with Coastal Multi-Use Maps

Joseph Maina, Kendall Jones, Christina Hicks, Tim McClanahan, James E. M. Watson,
Arthur O. Tuda and Serge Andréfouët

**Table S1.** description of activities that potentially conflict with marine conservation objectives.

| **Activity** | **Description of Data** |
| --- | --- |
| Fisheries | Spatial representation of nearshore areas where unsustainable fishing gear are in common use. Beach seines and other types of drag-nets are the most common form of destructive fishing gear that cause significant damage to reef habitats, juvenile fish populations and vulnerable species (Obura 2005). |
| Tourism | Spatial represents locations of scuba diving, sport fishing, and other tourism activities within and near existing MPAs (Tuda *et al.* 2014). Also included were proposed tourism ventures e.g., whale  shark sanctuaries |
| Sand Mining and dumping of  dredge spoils | Spatial data of proposed areas for sand harvesting for port construction. Sand harvesting refers to the actual process of removal of sand from the ocean bottom. Spatial data also represented area proposed for dumping of much, soil and hard materials from excavations that are ongoing for the expansion of an onshore railway terminal (AWEMAC, 2015). |
| Oil exploration | Spatial data include designated areas along the Kenya coast for oil and gas exploration. These are also potential sites for future oil and gas extraction based on oil exploration maps (www.nationaloil.co.ke) |
| Pollution | Urban areas along Kenya coast experience high levels of pollution from untreated wastewater. Spatial data represents shoreline areas characterized by high pollution load. |

**Table S2.** The AHP scale for pairwise comparison (Saaty, 1981).

| **Intensity of Importance** | **Definition** |
| --- | --- |
| 1 | Equal importance |
| 3 | Weak importance |
| 5 | Essential or strong importance |
| 7 | Demonstrated/very strong importance |
| 9 | Absolute importance |
| 2, 4, 6, 8 | Intermediate values between the two adjacent judgments |

**Table S3.** Amount of each habitat category by management type, as a proportion of the totoal ara of that management category.

|  | **High Compliance Closure** | **Low Compliance and Young Closure** | **Most Destructive Gear Restricted** | **No Gears Restricted** |
| --- | --- | --- | --- | --- |
| Backreef Heterogeneous | 2.1 | 3.9 | 1.0 | 0.6 |
| Channel | 2.5 | 0.0 | 1.1 | 1.1 |
| Crest | 1.4 | 2.2 | 2.5 | 2.8 |
| Deep Sand | 43.1 | 0.0 | 27.7 | 30.4 |
| Forereef—Coral | 1.9 | 0.3 | 1.3 | 0.4 |
| Forereef—Sand | 14.1 | 0.0 | 12.3 | 6.1 |
| Forereef—Seagrass | 7.2 | 4.5 | 13.5 | 16.5 |
| Inshore—Coral/Seagrass | 1.1 | 29.8 | 2.7 | 4.4 |
| Inshore—Dense Seagrass | 0.8 | 7.7 | 0.7 | 1.4 |
| Inshore—Sand | 0.3 | 4.6 | 1.0 | 1.0 |
| Lagoon—Coral/Seagrass | 11.9 | 4.0 | 16.9 | 14.1 |
| Lagoon—Dense Seagrass | 10.2 | 37.6 | 12.0 | 13.9 |
| Lagoon—Sand | 2.3 | 1.3 | 4.9 | 5.2 |
| Outer Flat—Dense Seagrass | 0.3 | 3.3 | 0.0 | 0.7 |
| Rubble Bank | 1.1 | 0.7 | 2.5 | 1.2 |

**Table S4.** Amount of each habitat category by management type, as a proportion of the totoal ara of that habitat category.

|  | **High Compliance Closure** | **Low Compliance and Young Closure** | **Most Destructive Gear Restricted** | **No Gears Restricted** |
| --- | --- | --- | --- | --- |
| Backreef Heterogeneous | 42.8 | 1.5 | 31.0 | 24.7 |
| Channel | 40.0 | 0.0 | 27.1 | 32.9 |
| Crest | 13.3 | 0.4 | 35.8 | 50.5 |
| Deep Sand | 30.8 | 0.0 | 29.5 | 39.8 |
| Forereef—Coral | 42.4 | 0.1 | 41.0 | 16.5 |
| Forereef—Sand | 32.4 | 0.0 | 41.9 | 25.8 |
| Forereef—Seagrass | 12.4 | 0.1 | 34.8 | 52.6 |
| Inshore—Coral/Seagrass | 7.9 | 4.1 | 29.2 | 58.9 |
| Inshore—Dense Seagrass | 16.7 | 3.1 | 22.2 | 58.0 |
| Inshore—Sand | 7.6 | 2.3 | 40.2 | 49.9 |
| Lagoon—Coral/Seagrass | 18.8 | 0.1 | 39.9 | 41.1 |
| Lagoon—Dense Seagrass | 18.7 | 1.3 | 32.9 | 47.1 |
| Lagoon—Sand | 12.0 | 0.1 | 37.9 | 49.9 |
| Outer Flat—Dense Seagrass | 16.7 | 3.9 | 3.5 | 75.9 |
| Rubble Bank | 15.3 | 0.2 | 53.2 | 31.3 |

**Table S5.** A matrix of classification accuracy for each of the three broad habitat categories (seagrass, coral/seagrass, and sand), and the overall classification accuracy.

|  |  | **Ground Truth** | | | **Total** |
| --- | --- | --- | --- | --- | --- |
| **Coral** | **Seagrass** | **Sand** |
| **Classification** | Coral/Seagrass | 13 | 54 | 39 | 106 |
| Seagrass | 16 | 48 | 23 | 87 |
| Sand | 5 | 9 | 38 | 52 |
|  |  |  |  |  | 245 |
|  |  | overall accuracy = correct predictions/total predictiosns | |  |  |
|  |  | correct | total | accuracy |  |
|  |  | 153 | 245 | 0.62 |  |
